# Supplementary material for: Regular Consumption of Cocoa and Red Berries as a Strategy to Improve Cardiovascular Biomarkers via Modulation of Microbiota Metabolism in Healthy Aging Adults
Source: MDPI journal article supplement (doi:10.3390/nu15102299), 2023-05-13
Supplement: s1 [file s1]

**Table S1.** Nutritional composition of the red berries mixture.

|                     | Per 100g | %ARI | Per doses (5g) | %ARI per 5g |
|---------------------|----------|------|----------------|-------------|
| Energy value (kcal) | 355.5    | 17.8 | 17.8           | 0.9         |
| Fat (g)             | 2.7      | 3.8  | 0.1            | 0.2         |
| Saturated (g)       | 0.1      | 0.6  | 0.0            | 0.0         |
| Carbohydrates (g)   | 86.5     | 33.3 | 4.3            | 1.7         |
| Sugars (g)          | 35.4     | 39.3 | 1.8            | 2.0         |
| Fibre (g)           | 39.9     | -    | 2.0            | -           |
| Protein (g)         | 7.3      | 14.6 | 0.4            | 0.7         |
| Salt (g)            | 0.2      | 0.3  | 0.01           | 0.0         |

Data adapted from the one provided by Salengei® (Barcelona, Spain). ARI: Adult Reference Intake (8400 KJ/ 2000 Kcal).

**Table S2.** Nutritional composition of cacao powder.

|                     | Per 100g | %ARI per 100g | Per doses (2.5g) | %ARI per 2.5g |
|---------------------|----------|---------------|------------------|---------------|
| Energy value (kcal) | 353      | 18            | 8.8              | 0.5           |
| Fat (g)             | 11       | 16            | 0.3              | 0.4           |
| Saturated (g)       | 6.8      | 34            | 0.2              | 0.9           |
| HC (g)              | 20       | 8             | 0.5              | 0.2           |
| Sugars (g)          | 2.45     | 3             | 0.1              | 0.1           |
| Fibre (g)           | 32       | -             | 0.8              | -             |
| Protein (g)         | 27.8     | 56            | 0.7              | 1.4           |
| Salt (g)            | 0.1      | 2             | 0.003            | 0.1           |
| Potassium (mg)      | 1524     | 76            | 38.1             | 1.9           |
| Calcium (mg)        | 128      | 16            | 3.2              | 0.4           |
| Phosphorus (mg)     | 734      | 105           | 18.4             | 2.6           |
| Magnesium (mg)      | 499      | 133           | 12.5             | 3.3           |
| Iron (mg)           | 13.9     | 99            | 0.3              | 2.5           |
| Zinc (mg)           | 6.8      | 68            | 0.2              | 1.7           |
| Copper (mg)         | 4        | 400           | 0.1              | 10            |
| Manganese (mg)      | 38       | 190           | 1                | 4.8           |
| Selenium (µg)       | 14.3     | 26            | 0.4              | 0.7           |

Data adapted from the one provided by Salengei® (Barcelona, Spain). ARI: Adult Reference Intake (8400 KJ/ 2000 Kcal).

**Table S3.** Demographics and characteristics of the participants at enrollment in each group.

|                          | Total        | RB           | C            | RB+C         | p-value |
|--------------------------|--------------|--------------|--------------|--------------|---------|
| N                        | 59           | 20           | 20           | 19           |         |
| Females                  | 71.2%        | 60%          | 85%          | 68.4%        | 0.22    |
| Age (years)              | 57.8 ± 6.94  | 56.4 ± 4.14  | 59.15 ± 9.08 | 57.84 ± 6.76 | 0.46    |
| Height (m)               | 1.65 ± 0.08  | 1.67 ± 0.10  | 1.62 ± 0.08  | 1.66 ± 0.06  | 0.14    |
| BMI (kg/m <sup>2</sup> ) | 25.79 ± 3.52 | 25.24 ± 2.62 | 26.23 ± 4.44 | 25.91 ± 3.38 | 0.67    |
| Smokers (%)              | 20%          | 15%          | 20%          | 26.3%        | 0.80    |
| Medication (%)           | 42.37%       | 50%          | 40%          | 36.84%       | 0.72    |

Data expressed as mean ± standard deviation (SD); significant difference at p-value < 0.05.

**Table S4.** Blood pressure and heart rate values in each group and by visit.

|                           | RB            |               |          | C             |               |          | RB+C          |               |          | p-value** |
|---------------------------|---------------|---------------|----------|---------------|---------------|----------|---------------|---------------|----------|-----------|
|                           | Baseline      | 12 w          | P-value* | Baseline      | 12 w          | P-value* | Baseline      | 12 w          | P-value* |           |
| Systolic pressure (mmHg)  | 123.1 ± 16.30 | 124.9 ± 16.30 | 0.34     | 126.2 ± 20.80 | 122.2 ± 18.50 | 0.22     | 118.4 ± 16.30 | 118.8 ± 16.10 | 0.89     | 0.80      |
| Diastolic pressure (mmHg) | 83 ± 11.10    | 83.4 ± 13.50  | 0.71     | 83.6 ± 12.80  | 81.2 ± 8.40   | 0.18     | 78.4 ± 10.80  | 80 ± 10.4     | 0.43     | 0.40      |
| Heart rate (bpm)          | 64.3 ± 9.79   | 69.97 ± 12.28 | 0.00     | 67.77 ± 10.71 | 73.06 ± 12.21 | 0.01     | 65.08 ± 7.88  | 66.99 ± 9.51  | 0.34     | 0.18      |

\* Significance within groups, \*\* significance between groups at the end of the intervention, a, b, c significant differences between groups data expressed as mean ± standard deviation (SD); significant difference at p-value < 0.05.

**Table S5.** P-value from the comparison between diets at the baseline.

Biomarkers of cardiovascular health

| Compound                       | p-value |
|--------------------------------|---------|
| TMAO (μM)                      | 0.827   |
| Total Protein (mg/ml)          | 0.718   |
| ACE/total protein              | 0.344   |
| NO (μM)                        | 0.294   |
| FMD (%)                        | 0.871   |
| Polyphenol/ creatinine (mg/ml) | 0.451   |
| Systolic pressure              | 0.671   |
| Diastolic pressure             | 0.220   |
| Heart rate                     | 0.278   |
| Homocysteine                   | 0.189   |
| Glucose                        | 0.326   |
| Creatinine                     | 0.445   |
| Uric acid                      | 0.280   |
| iron                           | 0.581   |
| Cholesterol                    | 0.317   |
| TG                             | 0.722   |
| HDL-C                          | 0.800   |
| TC/HDL                         | 0.898   |
| PCR                            | 0.698   |

#### Short chain fatty acids

| Compound | p-value |
|----------|---------|
| ACE      | 0.701   |
| PROV     | 0.491   |
| ISOB     | 0.090   |
| BUT      | 0.315   |
| ISOV     | 0.574   |
| VAL      | 0.981   |
| CAP      | 0.650   |
| HEP      | 0.179   |
| TOTAL    | 0.584   |
| FIA      | 0.730   |
| FIB      | 0.322   |

#### Biliary acids

| Compound  | p-value |
|-----------|---------|
| CDCA      | 0.224   |
| DCA       | 0.139   |
| GDCA      | 0.548   |
| GCA       | 0.904   |
| TDCA      | 0.346   |
| TCA       | 0.286   |
| GCDCA     | 0.390   |
| GUDCA     | 0.222   |
| TCDCA     | 0.285   |
| GLCA      | 0.931   |
| Total BA  | 0.215   |
| Primary   | 0.477   |
| Secondary | 0.122   |

Angiotensin-converting enzyme (ACE), Nitric oxide (NO), trimethylamine N-oxide (TMAO), Flow-mediated dilation (FMD), total cholesterol (TC), triglycerides (TG), C-reactive protein (CPR), acetic (ACE), propionic (PRO), isobutyric (ISOB), butyric (BUT), isovaleric (ISOV), valeric (VAL), caproic (CAP), heptanoic (HEP), fermentation index A (FIA), fermentation index B (FIAB), Chenodeoxycholic acid (CDCA), Deoxycholic acid (DCA), Glycodesoxycholic acid (GDCA), Glycolic acid (GCA), Taurodeoxycholic acid (TDCA), Taurocholic acid (TCA), Glycokenodeoxycholic acid (GCDCA), Glycoursodeoxycholic acid (GUDCA), Tauroquenedeoxycholic acid (TCDCA), Glycolithocholic acid (GLCA).
